# Supplementary material for: Thermal stability of C–F/C(–F)2 bonds in fluorinated graphene detected by in situ heating infrared spectroscopy
Source: Royal Society of Chemistry journal article supplement (doi:10.1039/d1cp04472a), 2021-01-01
Supplement: d1cp04472a1.pdf [file d1cp04472a1.pdf]

# Thermal stability of C-F/C-F<sub>2</sub> bonds in fluorinated graphene detected by in-situ heating infrared spectroscopy

*Yulong Li<sup>†</sup>, Jingliang Cheng<sup>†</sup>, Xu Wang<sup>†</sup>, Yang Liu<sup>\*†</sup>, Xiangyang Liu<sup>\*†</sup>,*

<sup>†</sup> State Key Laboratory of Polymer Materials Engineering, College of Polymer Science and Engineering, Sichuan University, No.24 South Section 1, Yihuan Road, Chengdu, Sichuan, 610065, P.R. China.

\* Corresponding author.

\*Xiangyang Liu, Tel: +86-028-85403948; Email: [lx6912@sina.com](mailto:lx6912@sina.com)

\*Yang Liu, Tel: +86-028-85403948; Email: [liuyangscu@126.com](mailto:liuyangscu@126.com)

---

## **Details about in situ Fourier transform infrared (FTIR) spectroscopy combining with moving-window two-dimensional (MW2D) technique and 2DCS software**

The FG powder is sandwiched between two BaF<sub>2</sub> slides, which are cleaned and dried, and then put into an in-situ cell. The prepared sample is subjected to in-situ infrared spectroscopy analysis under nitrogen atmosphere. The temperature range from 30 °C to 650 °C and the heating rate was 5 °C/min. The obtained infrared spectra are corrected by OMNIC software, and then analyzed by two-dimensional correlation infrared software, which is developed by Tao Zhou. Before calculation, we use OMNIC software to perform a linear baseline correction for the infrared spectra in the range of 1610 cm<sup>-1</sup> - 1495 cm<sup>-1</sup> and 1400 cm<sup>-1</sup> -1000 cm<sup>-1</sup>.

The 2DCS software we use was developed by Professor Tao Zhou from Sichuan University. To ensure the credibility of results, the baseline of spectra in the regions of 1350-1020 cm<sup>-1</sup> and 1620-1480 cm<sup>-1</sup> were corrected by linear baseline correction. The window size of PCMW2D spectra was chosen as 11 (2m+1). In the PCMW2D correlation spectra, the red and blue areas represent positive and negative correlations, respectively.

---

**F/C ratio and  $I_{1219}/I_{1528}$  datas of FGs**

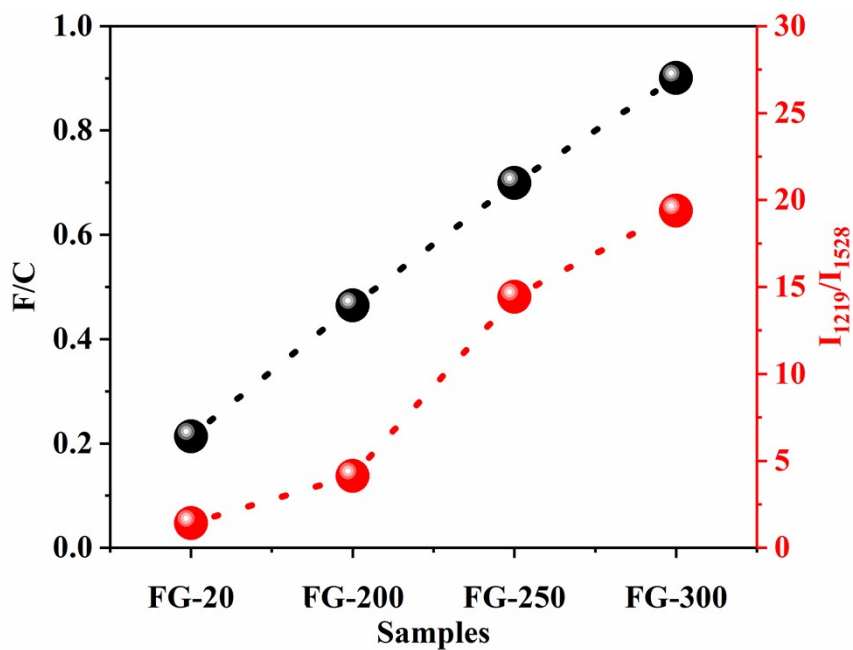

Figure S1. The F/C ratio calculated from XPS spectra and  $I_{1219}/I_{1528}$  calculated from FTIR spectra of FG samples with different fluorination temperature.

---

**TGA and DTG data of graphene raw materials**

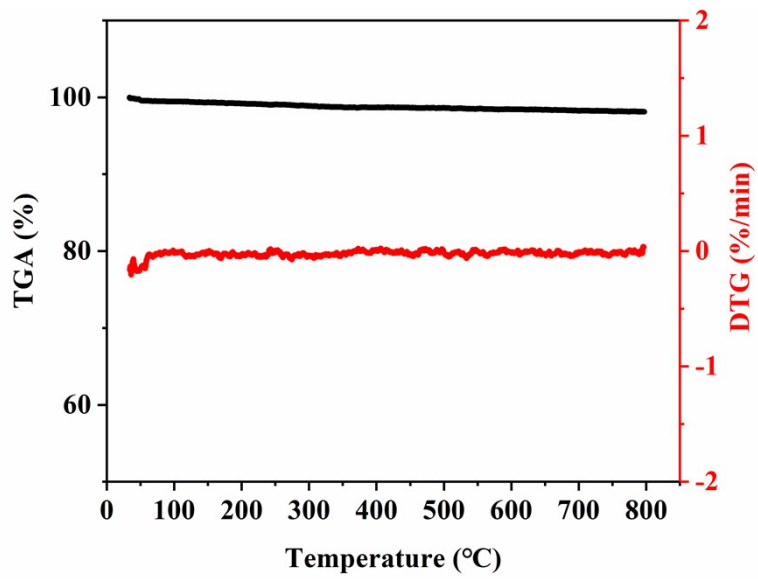

Figure S2. TGA and DTG curves of G.

## AFM images of graphene and FG-300

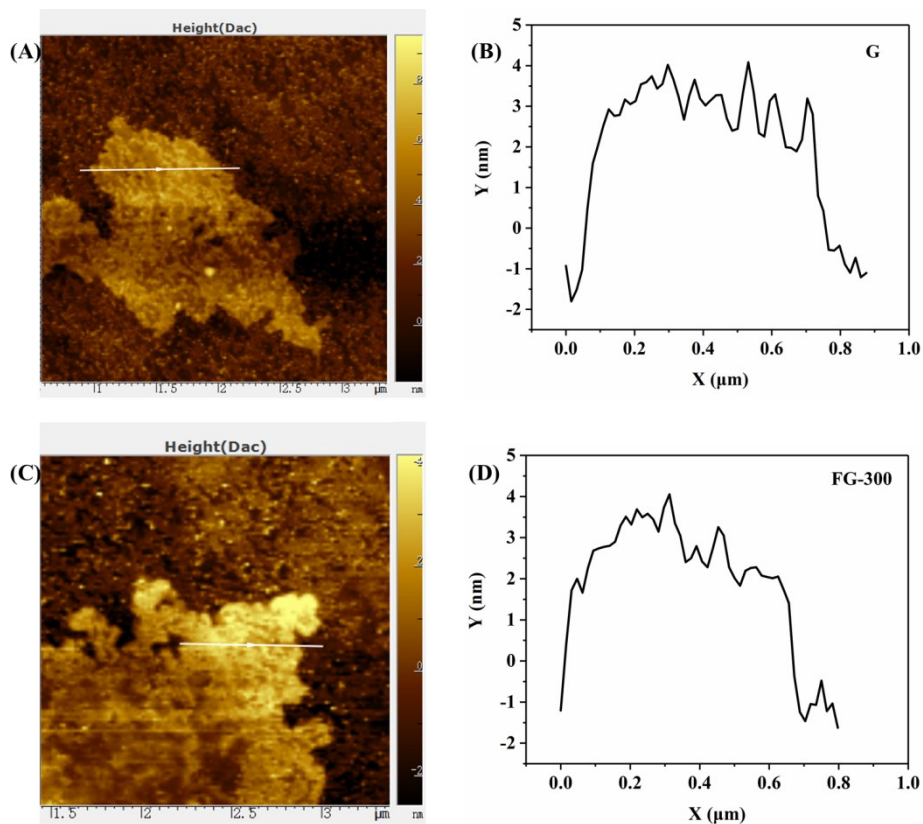

Figure S3. AFM images of graphene (A, B) and FG-300 (A, B).

Atomic Force Microscopy (AFM) test is carried out by using the SmartSPM instrument (AIST-NT, Inc., Novato CA, USA). For AFM test, 1 mg graphene or fluorinated graphene is ultrasonically dispersed in 20 ml ethanol, and then centrifuged at 8000 rpm for 1 minute. The cleaned Si wafer is immersed in the supernatant for seconds. Finally, the prepared silicon wafer loaded with CNFs was tested using the AFM tapping mode.

---

**TEM images of FG-20, FG-200 and FG-300**

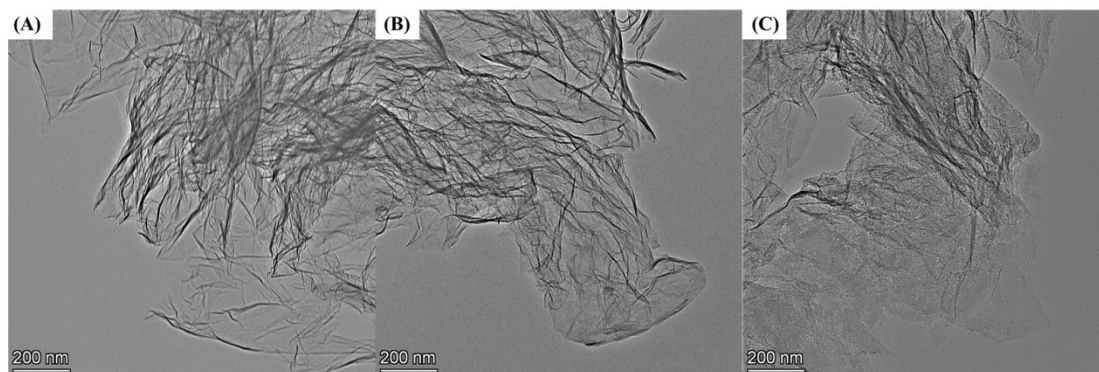

Figure S4. TEM images of FG-20 (A), FG-200 (B) and FG-300 (C).

## PCMW2D synchronous spectra in the regions of 1300-1220 $\text{cm}^{-1}$ of FG-300

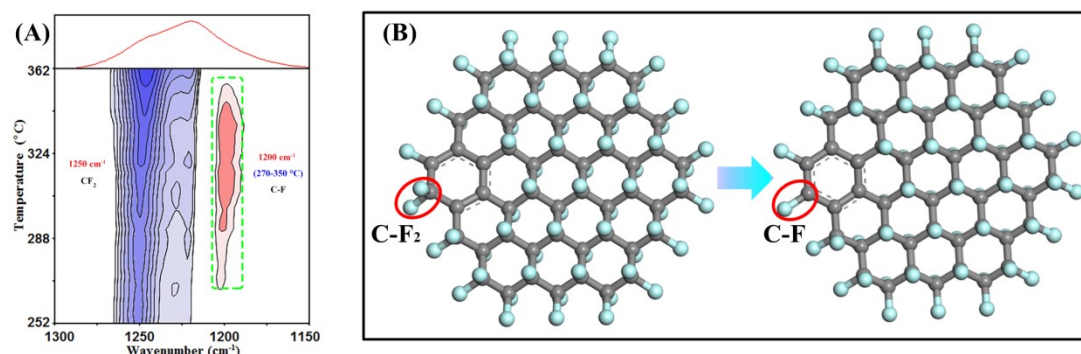

**Figure S5.** (A) The PCMW2D synchronous spectra in the regions of 1300-1150  $\text{cm}^{-1}$  calculated from the dynamic FTIR spectra of FG-300; (B) schematic diagram of the transition of  $\text{C-F}_2$  bond adjacent to the conjugated structure transforming into  $\text{C-F}$  bond.

It can be seen that after the blue correlation peak appears at  $1250 \text{ cm}^{-1}$ , red correlation peak appears at  $1200 \text{ cm}^{-1}$  (270-350 °C). This indicates that the  $\text{C-F}$  bonds are formed in the defluorination process of  $\text{C-F}_2$ . Therefore, the  $\text{C-F}_2$  bonds will release an F atom during the annealing process and form an edge  $\text{C-F}$  bond (Fig S5B). The DFT calculation results show that the bond energy of  $\text{C-F}$  in the  $\text{C-F}_2$  adjacent to the conjugated structure is 76.3 Kcal/mol, while the bond energy of the edge  $\text{C-F}$  bond adjacent to the conjugated structure is as high as 102.1Kcal/mol. This further proves the speculation of the transition from  $\text{C-F}_2$  to  $\text{C-F}$ .

---

## Structures of FGs with different kinds of C-F bonds

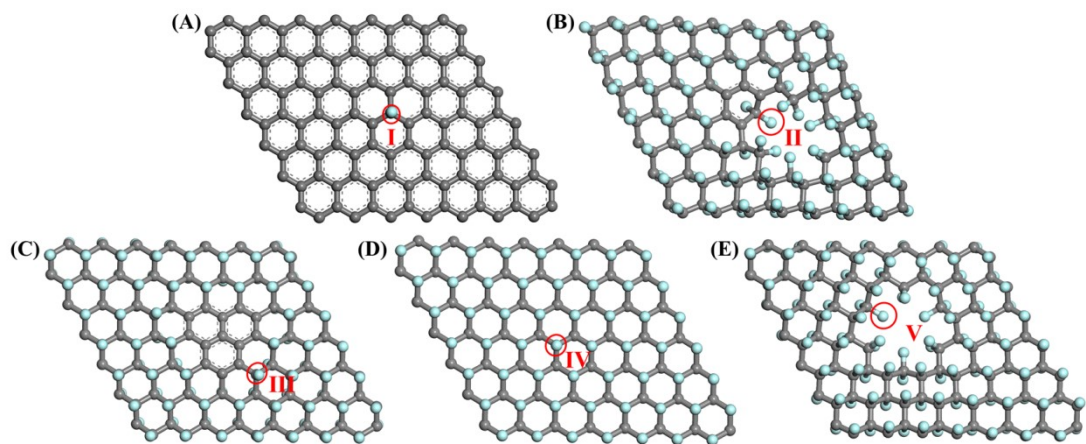

Figure S6. The structures of FGs with five kinds of C-F bonds after optimization.



---

**PCMW2D synchronous spectra in the regions of 1580-1495  $\text{cm}^{-1}$  of FG-300**

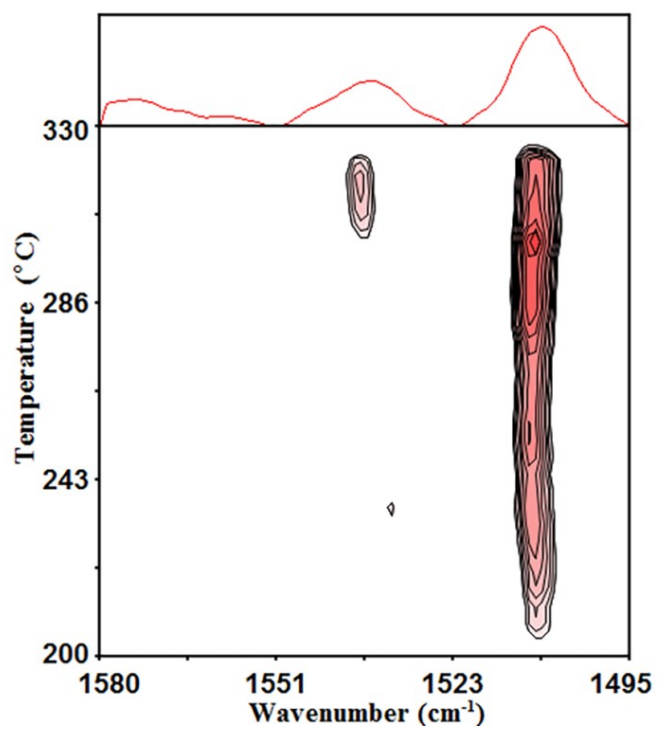

Figure S7. The PCMW2D synchronous spectra in the regions of 1580-1495  $\text{cm}^{-1}$  calculated from the dynamic FTIR spectra of FG-300.

---

## FG structures with different sizes of conjugated regions

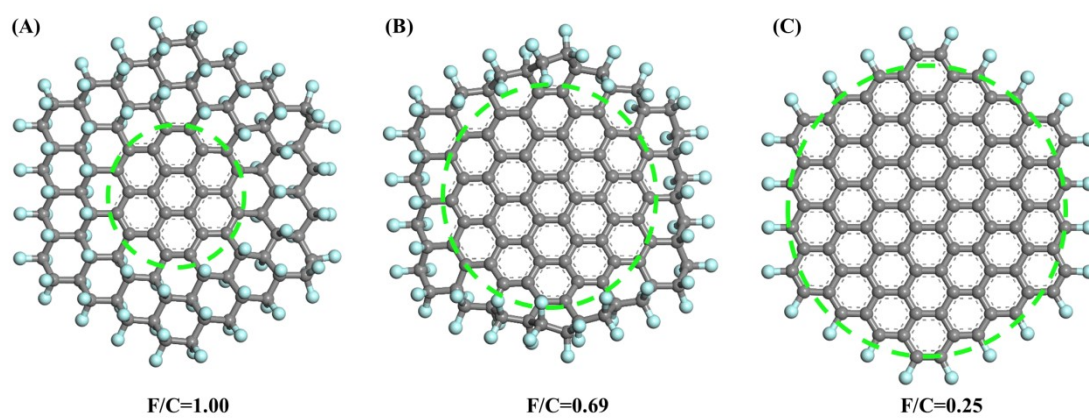

Figure S8. FG structures with different sizes of conjugated regions.

Table S1. C1s data of FGs.

|        | 293.0 eV | 291.8 eV | 290.0 eV | 287.0 eV | 285.2 eV | 284.4 eV |
|--------|----------|----------|----------|----------|----------|----------|
| FG-20  | 1.43     | 3.46     | 20.83    | 14.00    | 39.06    | 21.22    |
| FG-200 | 1.69     | 8.37     | 43.39    | 12.94    | 17.41    | 16.20    |
| FG-250 | 1.33     | 8.57     | 60.98    | 8.12     | 11.13    | 9.87     |
| FG-300 | 1.32     | 20.17    | 71.41    | 1.77     | 3.50     | 1.83     |

Table S2. Data of peak fitting of infrared characteristic absorption peaks.

|        | 1311 cm <sup>-1</sup> | 1250 cm <sup>-1</sup> | 1219 cm <sup>-1</sup> | 1165 cm <sup>-1</sup> | 1112 cm <sup>-1</sup> | 1050 cm <sup>-1</sup> |
|--------|-----------------------|-----------------------|-----------------------|-----------------------|-----------------------|-----------------------|
| FG-20  | 0.69                  | 20.16                 | 16.53                 | 19.42                 | 22.98                 | 22.22                 |
| FG-200 | 7.53                  | 23.78                 | 17.56                 | 25.76                 | 11.99                 | 13.38                 |
| FG-250 | 12.16                 | 7.25                  | 52.63                 | 13.13                 | 11.52                 | 3.31                  |
| FG-300 | 12.63                 | 5.79                  | 67.65                 | 6.20                  | 6.37                  | 1.35                  |

---

Reference:

1. H. Arnolds, *Progress in Surface Science*, 2011, **86**, 1-40.
2. P. Zhang, Y. X. Chen, J. Cai, S. Z. Liang, J. F. Li, A. Wang, B. Ren and Z. Q. Tian, *Journal of Physical Chemistry C*, 2009, **113**, 17518-17526.
